# Supplementary material for: Bayesian networks elucidate complex genomic landscapes in cancer
Source: PubMed Central journal article supplement (PMC8980036; doi:10.1038/s42003-022-03243-w), 2022-04-04
Supplement: 42003_2022_3243_MOESM3_ESM.pdf [file 42003_2022_3243_MOESM3_ESM.pdf]

## Description of Additional Supplementary Files

**File name:** Supplementary Data 1

**Description:** All input matrices to learning the BNs in this paper.
